# Supplementary material for: Outcomes of combined endoscopic vitrectomy and posteriorly placed glaucoma drainage devices in pediatric patients
Source: PubMed Central journal article supplement (PMC8976343; doi:10.1186/s12886-022-02373-3), 2022-04-01
Supplement: 12886_2022_2373_MOESM1_ESM.pdf [file 12886_2022_2373_MOESM1_ESM.pdf]

**Supplemental Table 1: Glaucoma Drainage Device Information**

|                                                                                                                                                                                                                             | <b>BV350</b> | <b>BV250</b> | <b>Ahmed<br/>FP7</b> | <b>Ahmed<br/>FP8</b> |
|-----------------------------------------------------------------------------------------------------------------------------------------------------------------------------------------------------------------------------|--------------|--------------|----------------------|----------------------|
| <b>Anterior-Posterior Plate Length (mm)</b>                                                                                                                                                                                 | 16           | 14           | 16                   | 11                   |
| <b>Estimated Minimal Axial Length (mm) if GDD Placed in Superotemporal Quadrant</b>                                                                                                                                         | 20           | 18           | 20                   | 16                   |
| <b>Plate Surface Area (mm<sup>2</sup>)</b>                                                                                                                                                                                  | 350          | 250          | 184                  | 102                  |
| <b>Valved</b><br>- Immediate pressure lowering effect<br>- Less risk of post-operative hypotony<br>- Higher risk of hypertensive phase/<br>plateencapsulation                                                               | No           | No           | Yes                  | Yes                  |
| <b>Non Valved</b><br>- Delayed pressure lowering effect (3-6 wks)<br>- Requires temporary ligation or staged procedure<br>- Greater risk of post-operative hypotony<br>- Lower risk of hypertensive phase/<br>encapsulation | Yes          | Yes          | No                   | No                   |

Comparison of characteristics of Baerveldt (BV) and Ahmed glaucoma drainage devices (GDD). Estimated minimal axial length based on anterior-posterior plate length, corneal diameter, and GDD plate placement at least 6 mm posterior to the limbus and more than 3 mm from the optic nerve. (Chandramouli SA et al, Reference #18).
